# Supplementary material for: Infectious DNAs derived from insect-specific flavivirus genomes enable identification of pre- and post-entry host restrictions in vertebrate cells
Source: PubMed Central journal article supplement (PMC5462777; doi:10.1038/s41598-017-03120-1), 2017-06-07
Supplement: 41598_2017_3120_MOESM1_ESM.pdf [file 41598_2017_3120_MOESM1_ESM.pdf]

# **Infectious DNAs derived from insect-specific flavivirus genomes enable identification of pre- and post-entry host restrictions in vertebrate cells**

Thisun B.H Piyasena<sup>1#</sup>, Yin X. Setoh<sup>1#</sup>, Jody Hobson-Peters<sup>1#</sup>, Natalee D Newton<sup>1</sup>, Helle Bielefeldt-Ohmann<sup>1</sup>, Breeanna J McLean<sup>1</sup>, Laura J. Vet<sup>1</sup>, Alexander A. Khromykh<sup>1\*</sup> and Roy A. Hall<sup>1\*</sup>

<sup>1</sup>Australian Infectious Diseases Research Centre, School of Chemistry and Molecular Biosciences, The University of Queensland, St Lucia 4072, Queensland, Australia.

# These authors contributed equally

\*Address correspondence to Roy A. Hall, [roy.hall@uq.edu.au](mailto:roy.hall@uq.edu.au) and Alexander A. Khromykh, [alexander.khromykh@uq.edu.au](mailto:alexander.khromykh@uq.edu.au)

## Supplementary Data

**Supplementary Table S1.** Sequence comparison between PaRV<sub>CPEC</sub> and PaRV<sub>CPECM1</sub> showing a 15 nucleotide change in PaRV<sub>CPECM1</sub>.

| Sequence Name          | Sequence                                          |
|------------------------|---------------------------------------------------|
| PaRV <sub>WT</sub>     | ACCTTGGA <u>--- AGAGCCTCACGT</u> GCGGAAGAGAAGGGAA |
| PaRV <sub>CPEC</sub>   | ACCTTGGA <u>--- AGAGCCTCACGT</u> GCGGAAGAGAAGGGAA |
| PaRV <sub>CPECM1</sub> | ACCTTGGA <u>AGACGCAGCAGAAGG</u> GCGGAAGAGAAGGGAA  |

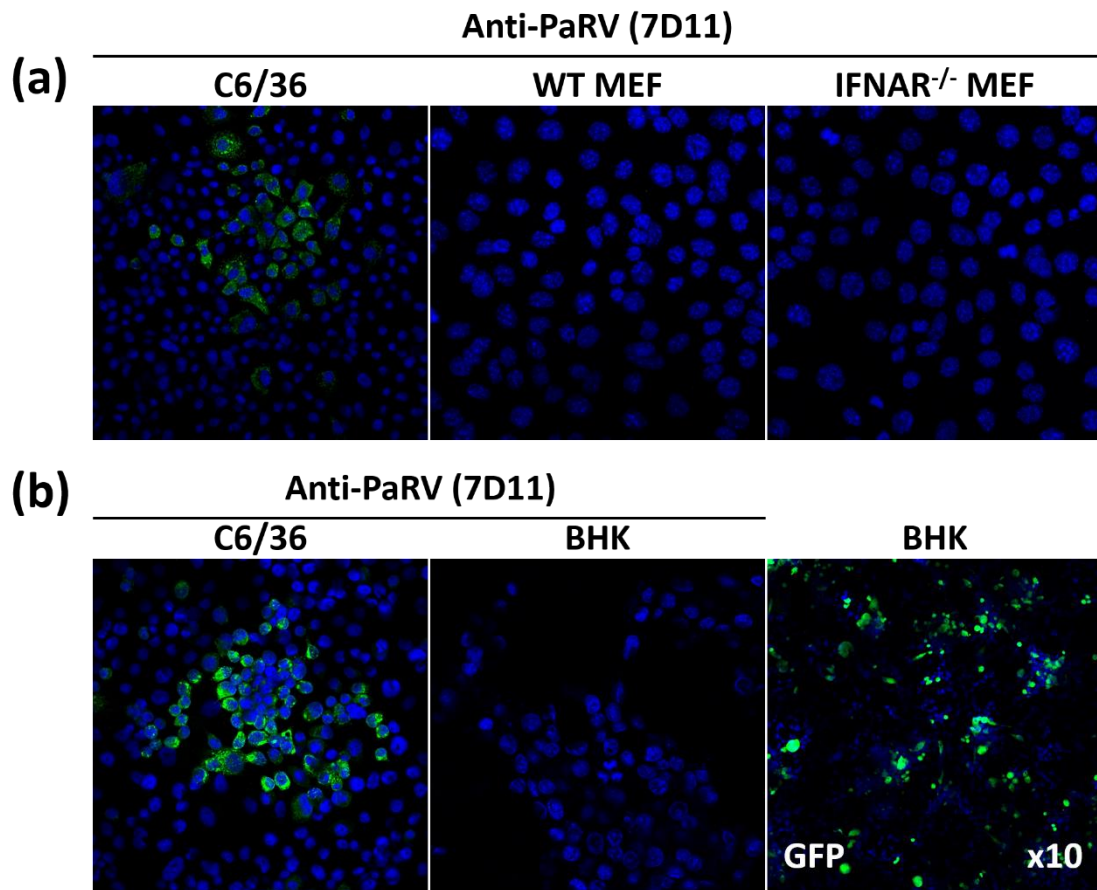

**Supplementary Fig. S1.** IFA visualisation of independent transfections of PaRV RNA into C6/36 cells and either (a) WT and IFNAR<sup>-/-</sup> MEF cells or (b) BHK cells. RNA from a GFP-nanoLuc fusion protein expressing WNV replicon was also included as a transfection control in BHK cells. IFA analysis was performed by probing with anti-PaRV E (7D11). Monolayers were fixed 72 hrs post-infection. IFA analysis was performed by probing with PaRV mouse anti-sera. The nucleus of each cell was stained with Hoechst 33342. Images were taken at  $\times 40$  magnification or as indicated.

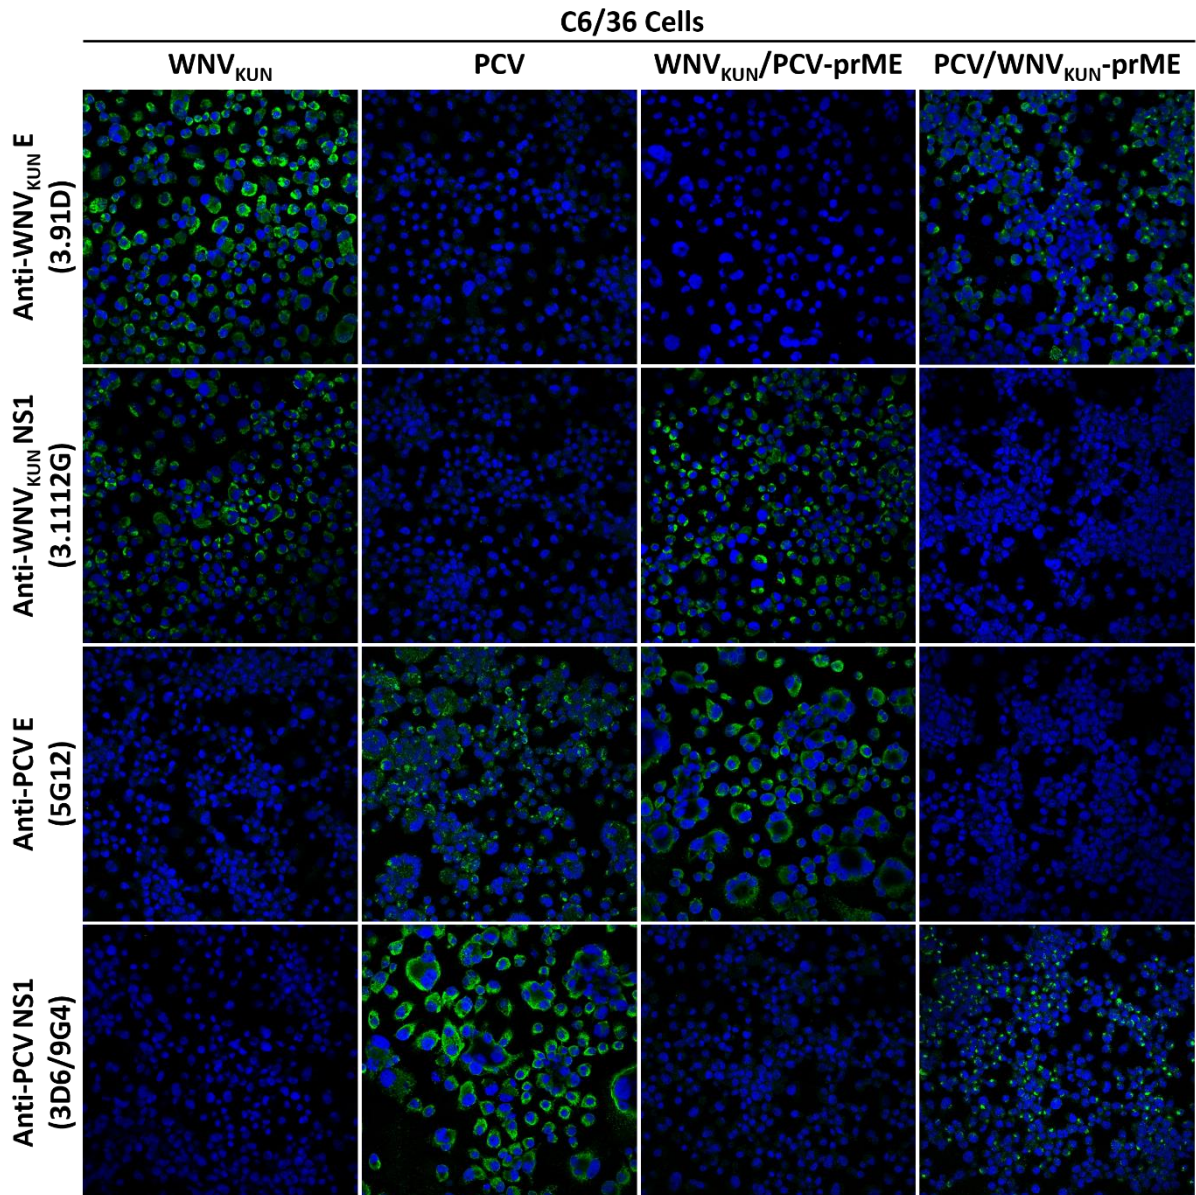

**Supplementary Fig. S2.** Visualisation of C6/36 cells infected with either WNV<sub>KUN</sub>, PCV, PCV/WNV<sub>KUN</sub>-prME or WNV<sub>KUN</sub>/PCV-prME at an MOI of 1. Monolayers were fixed 72 hrs post-infection. IFA analysis was performed by probing with anti-PCV E (5G12), anti-PCV NS1 (3D6/9G4), anti-WNV E (3.91D) and anti-WNV NS1 (3.1112G) mouse monoclonal antibodies. The nucleus of each cell was stained with Hoechst 33342. Images were taken at  $\times 40$  magnification.
